# Supplementary material for: Microperoxidase-11 modified mesoporous SnO2 film electrodes for the detection of antimalarial drug artemisinin
Source: Royal Society of Chemistry journal article supplement (doi:10.1039/c9ay00764d), 2019-01-01
Supplement: c9ay00764d1.pdf [file c9ay00764d1.pdf]

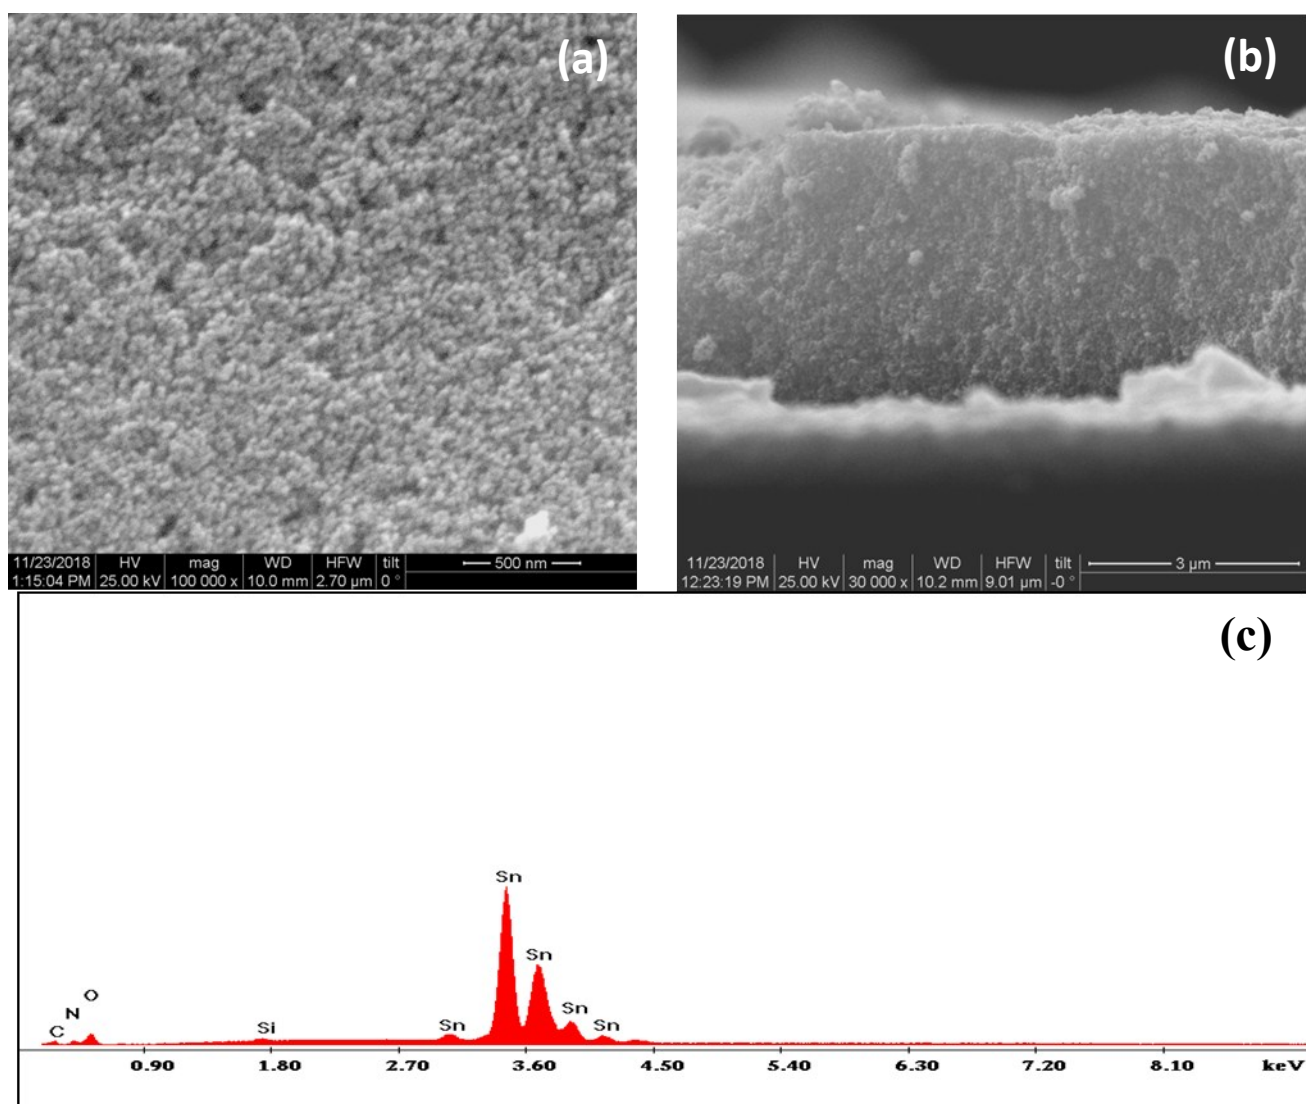

Figure S1: FE-SEM images of SnO<sub>2</sub>/ITO glass (a) top view, (b) side view and (c) EDS analysis.

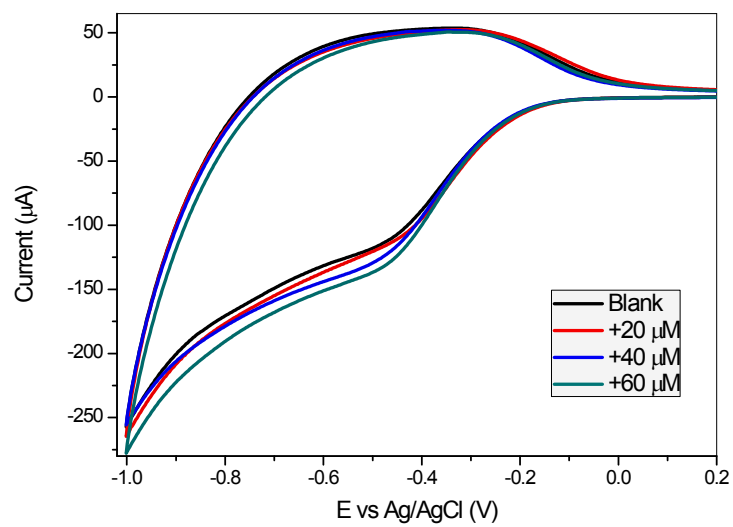

Figure S2: CVs of MP11/DDAB/SnO<sub>2</sub>/ITO film electrode at 0.05 V s<sup>-1</sup> before and after the addition of pharmaceutical extracts of the plant *Artemisia annua*.
